# Supplementary material for: Atrophy of retinal vessels in neovascular age-related macular degeneration following long-term treatment with 20 intravitreal anti-VEGF injections
Source: Springer Nature journal article supplement (doi:10.1186/s12886-022-02700-8), 2022-12-05
Supplement: MOESM1 [file 23790434]

| Pat.No. | Age   | Eye | VA    | CNV  | Scan qual | No. treat | CRT    | SPF fovea | SPF parafovea | SPF whole | D fovea | D parafovea | D whole | SPF non-flow | FAZ   | Follow up (Months) |
|---------|-------|-----|-------|------|-----------|-----------|--------|-----------|---------------|-----------|---------|-------------|---------|--------------|-------|--------------------|
| 1       | 77    | OD  | 75    | 1    | 6         | 5         | 287    | 28,6      | 50,7          | 48,5      | 30,1    | 50,1        | 48,3    | 0,417        | 0,340 | 12                 |
| 2       | 66    | OS  | 64    | 2    | 8         | 8         | 298    | 27,2      | 45,3          | 34,6      | 30,4    | 49,2        | 47,2    | 0,372        | 0,290 | 12                 |
| 3       | 83    | OD  | 79    | 2    | 6         | 7         | 297    | 27,8      | 47,9          | 31,6      | 31,5    | 50,2        | 46,3    | 0,310        | 0,270 | 11                 |
| 4       | 82    | OS  | 64    | 2    | 7         | 7         | 321    | 23        | 46,1          | 34,7      | 33      | 45,3        | 42,3    | 0,526        | 0,430 | 13                 |
| 5       | 74    | OD  | 78    | 1    | 9         | 11        | 299    | 39,4      | 46,8          | 30,5      | 35,4    | 49,1        | 46,2    | 0,208        | 0,190 | 12                 |
| 6       | 63    | OD  | 49    | 1    | 7         | 8         | 431    | 39,7      | 49,3          | 31,9      | 40,1    | 44,1        | 42,1    | 0,671        | 0,492 | 12                 |
| 7       | 85    | OD  | 57    | 1    | 8         | 5         | 398    | 9         | 50,3          | 39,5      | 17,2    | 40,2        | 37,4    | 1,007        | 0,560 | 12                 |
| 8       | 90    | OD  | 60    | 1    | 7         | 6         | 371    | 16,1      | 43,6          | 36,5      | 23,6    | 39,1        | 37,3    | 1,149        | 0,850 | 12                 |
| 9       | 77    | OD  | 63    | 1    | 6         | 7         | 318    | 18,2      | 48,3          | 39,4      | 22,9    | 44,2        | 40,2    | 0,984        | 0,760 | 13                 |
| 10      | 70    | OD  | 69    | 2    | 8         | 8         | 293    | 27,2      | 43,3          | 41,6      | 29,5    | 49,4        | 46,7    | 0,599        | 0,430 | 14                 |
| 11      | 63    | OS  | 50    | 2    | 8         | 6         | 341    | 31,9      | 47,4          | 40,1      | 33,1    | 48,5        | 42,5    | 0,370        | 0,290 | 12                 |
| 12      | 72    | OD  | 59    | 2    | 6         | 6         | 299    | 28,3      | 50,1          | 32,4      | 30,1    | 46          | 44,1    | 0,321        | 0,270 | 12                 |
| 13      | 74    | OS  | 46    | 1    | 6         | 7         | 287    | 41,6      | 39,8          | 43,1      | 29,5    | 42,1        | 41      | 0,473        | 0,320 | 12                 |
| 14      | 74    | OD  | 70    | 2    | 7         | 6         | 199    | 21        | 45,4          | 25,7      | 27,5    | 42,4        | 40,9    | 0,456        | 0,350 | 12                 |
| 15      | 83    | OD  | 65    | 2    | 7         | 7         | 223    | 28,7      | 48,1          | 32,1      | 30,2    | 45,2        | 43,1    | 0,350        | 0,270 | 11                 |
| 16      | 91    | OD  | 76    | 2    | 6         | 7         | 297    | 28        | 49,5          | 33,5      | 34,5    | 42,5        | 40,1    | 0,330        | 0,290 | 11                 |
| 17      | 85    | OD  | 54    | 1    | 8         | 6         | 281    | 43,1      | 47,7          | 44,7      | 44,2    | 46,1        | 45,4    | 0,241        | 0,190 | 12                 |
| 18      | 66    | OD  | 59    | 2    | 8         | 7         | 279    | 14,8      | 35,4          | 33,3      | 26,6    | 47,7        | 45,3    | 0,559        | 0,206 | 11                 |
| 19      | 70    | OD  | 49    | 1    | 6         | 6         | 234    | 10,3      | 50,1          | 45,8      | 23,6    | 54,7        | 51,5    | 0,715        | 0,486 | 12                 |
| 20      | 72    | OD  | 64    | 1    | 9         | 7         | 287    | 21,1      | 39,7          | 38        | 39,6    | 45,8        | 45,3    | 0,477        | 0,220 | 11                 |
| 21      | 62    | OS  | 71    | 2    | 7         | 6         | 276    | 17,1      | 43,4          | 39,6      | 33,8    | 50,8        | 47,9    | 0,478        | 0,292 | 12                 |
| 22      | 79    | OS  | 60    | 2    | 8         | 7         | 267    | 30,9      | 34,8          | 34,9      | 48,6    | 54,3        | 52,5    | 0,278        | 0,148 | 13                 |
| 23      | 84    | OD  | 73    | 1    | 9         | 7         | 287    | 18        | 30,3          | 30,2      | 37,8    | 58          | 55,5    | 0,522        | 0,207 | 13                 |
| 24      | 64    | OS  | 70    | 2    | 7         | 7         | 267    | 18,1      | 48,2          | 44        | 28,3    | 49,4        | 47,3    | 0,482        | 0,339 | 12                 |
| 25      | 65    | OD  | 66    | 2    | 6         | 7         | 278    | 24,8      | 45            | 43,6      | 36,1    | 50,8        | 48,9    | 0,309        | 0,235 | 12                 |
| Mean    | 74,84 |     | 63,60 |      | 7,20      | 6,84      | 296,60 | 25,36     | 45,06         | 37,19     | 31,89   | 47,41       | 45,01   | 0,504        | 0,349 | 12,04              |
| SD      | 8,83  |     | 9,39  |      | 1,04      | 1,18      | 49,68  | 9,28      | 5,33          | 5,80      | 6,93    | 4,57        | 4,49    | 0,242        | 0,172 | 0,73               |
| 26      | 67    | R   | 69    | 1    | 9         | 22        | 334    | 13        | 35            | 34,7      | 27,4    | 43,1        | 42,6    | 0,461        | 0,258 | 34                 |
| 27      | 75    | L   | 48    | 2    | 7         | 20        | 218    | 25,3      | 42,6          | 42,1      | 43,8    | 53,7        | 50,4    | 0,437        | 0,386 | 37                 |
| 28      | 72    | R   | 65    | 2    | 6         | 20        | 324    | 8,8       | 45,9          | 42,6      | 31,2    | -           | 47,4    | 0,690        | 0,480 | 28                 |
| 29      | 77    | R   | 60    | 1    | 6         | 21        | 238    | 12,7      | 39            | 35,9      | 28,7    | 53,2        | 49,2    | 0,555        | 0,343 | 42                 |
| 30      | 68    | R   | 74    | 2    | 7         | 20        | 222    | 19,9      | 35,5          | 33,3      | 17,4    | 39,6        | 36,7    | 0,493        | 0,428 | 44                 |
| 31      | 72    | L   | 69    | 2    | 8         | 20        | 412    | 21,9      | 46,9          | 45        | 20,2    | 37,3        | 35,9    | 0,339        | 0,318 | 47                 |
| 32      | 67    | L   | 60    | 1    | 7         | 20        | 320    | 15,1      | 43,6          | 40,4      | 23,7    | 43,3        | 41,7    | 0,471        | 0,358 | 50                 |
| 33      | 68    | L   | 69    | 1    | 6         | 20        | 192    | 12,9      | 40,5          | 38,4      | 25,1    | 55,8        | 53,1    | 0,585        | 0,475 | 32                 |
| 34      | 70    | L   | 49    | 2    | 8         | 20        | 186    | 18,3      | 32,6          | 29,8      | 29,8    | 38,4        | 35,3    | 0,427        | 0,039 | 34                 |
| 35      | 71    | L   | 85    | 2    | 6         | 20        | 189    | 4,4       | 38,6          | 38,4      | 18,7    | 50,9        | 39      | 0,936        | 0,477 | 33                 |
| 36      | 75    | L   | 48    | 1    | 6         | 20        | 281    | 23,9      | 40,5          | 39,4      | 37,1    | 53,5        | 46,8    | 0,431        | 0,290 | 36                 |
| 37      | 77    | R   | 64    | 1    | 7         | 20        | 421    | 26,5      | 45,5          | 42,7      | 33,8    | 34,6        | 35,5    | 0,402        | 0,083 | 40                 |
| 38      | 67    | L   | 69    | 2    | 6         | 19        | 265    | 21,2      | 40,9          | 38,1      | 37      | 47          | 45,8    | 0,475        | 0,223 | 45                 |
| 39      | 65    | L   | 74    | 1    | 9         | 20        | 226    | 25,9      | 48,4          | 45,6      | 37,8    | 49,1        | 47,9    | 0,273        | 0,368 | 39                 |
| 40      | 66    | R   | 60    | 2    | 6         | 20        | 248    | 1,6       | 38,0          | 35,1      | 14,9    | 56,1        | 52      | 0,558        | 0,955 | 60                 |
| 41      | 78    | R   | 86    | 2    | 8         | 21        | 276    | 15,8      | 42,8          | 39,6      | 26,7    | 47,6        | 45,8    | 0,520        | 0,290 | 28                 |
| 42      | 74    | R   | 73    | 1    | 7         | 22        | 312    | 18,8      | 43,4          | 39,3      | 36,5    | 49,2        | 47      | 0,487        | 0,278 | 40                 |
| Mean    | 71,12 |     | 66,00 |      | 7,00      | 20,29     | 274,35 | 16,82     | 41,36         | 38,85     | 28,81   | 47,03       | 44,24   | 0,502        | 0,356 | 39,35              |
| SD      | 4,27  |     | 11,25 |      | 1,06      | 0,77      | 71,70  | 7,33      | 4,45          | 4,18      | 8,21    | 6,91        | 5,93    | 0,147        | 0,198 | 8,24               |
| 43      | 65    | OS  | 76    | 0    | 8         | 0         | 255    | 17,6      | 38            | 37,8      | 36,3    | 49,9        | 49,3    | 0,405        | 0,233 | na                 |
| 44      | 75    | OS  | 78    | 0    | 8         | 0         | 261    | 22,4      | 47,6          | 46        | 36,9    | 49          | 48,7    | 0,380        | 0,195 | na                 |
| 45      | 67    | OS  | 78    | 0    | 9         | 0         | 241    | 19,8      | 45,1          | 42,5      | 36,2    | 49,7        | 48,1    | 0,409        | 0,164 | na                 |
| 46      | 78    | OD  | 80    | 0    | 8         | 0         | 238    | 29,3      | 45,5          | 42,3      | 35,4    | 50,1        | 48,1    | 0,244        | 0,189 | na                 |
| 47      | 78    | OS  | 81    | 0    | 9         | 0         | 267    | 25,9      | 51,6          | 44,1      | 33,2    | 49,6        | 49,1    | 0,307        | 0,201 | na                 |
| 48      | 81    | OD  | 85    | 0    | 8         | 0         | 270    | 32,5      | 50,4          | 45,6      | 38      | 50          | 48,2    | 0,180        | 0,170 | na                 |
| 49      | 81    | OS  | 86    | 0    | 7         | 0         | 271    | 22,6      | 47,4          | 44,1      | 35,9    | 48,3        | 46,7    | 0,184        | 0,178 | na                 |
| 50      | 65    | OD  | 87    | 0    | 8         | 0         | 244    | 23,8      | 56            | 50,2      | 39,2    | 50,3        | 47,2    | 0,396        | 0,213 | na                 |
| 51      | 65    | OS  | 75    | 0    | 6         | 0         | 280    | 20,8      | 47,5          | 44,7      | 37,3    | 51          | 48      | 0,497        | 0,221 | na                 |
| 52      | 67    | OD  | 80    | 0    | 7         | 0         | 270    | 32,8      | 60,1          | 52,1      | 38,1    | 50,1        | 47,3    | 0,231        | 0,198 | na                 |
| 53      | 67    | OS  | 85    | 0    | 8         | 0         | 261    | 32,1      | 54,5          | 48,1      | 35,1    | 49,9        | 45,2    | 0,237        | 0,194 | na                 |
| 54      | 83    | OD  | 87    | 0    | 9         | 0         | 266    | 25,2      | 48,2          | 43,2      | 36,2    | 50,1        | 47,2    | 0,213        | 0,189 | na                 |
| 55      | 73    | OD  | 79    | 0    | 7         | 0         | 252    | 20,6      | 52,3          | 47,8      | 33,4    | 51,3        | 46,5    | 0,419        | 0,352 | na                 |
| 56      | 77    | OD  | 86    | 0    | 7         | 0         | 249    | 23,8      | 49,2          | 46,3      | 34,6    | 49,3        | 45,2    | 0,367        | 0,270 | na                 |
| 57      | 76    | OD  | 85    | 0    | 8         | 0         | 269    | 31,4      | 53            | 46,7      | 39,1    | 49,9        | 46,3    | 0,292        | 0,251 | na                 |
| 58      | 65    | OD  | 85    | 0    | 8         | 0         | 258    | 29,2      | 52,8          | 45,2      | 35,2    | 49,7        | 47,2    | 0,267        | 0,203 | na                 |
| 59      | 72    | OD  | 84    | 0    | 7         | 0         | 263    | 29,7      | 47,9          | 43,3      | 37,1    | 50,1        | 46,3    | 0,249        | 0,221 | na                 |
| 60      | 85    | OD  | 84    | 0    | 8         | 0         | 255    | 22,5      | 48,8          | 45,2      | 35,2    | 50,2        | 46,9    | 0,449        | 0,340 | na                 |
| Mean    | 73,33 |     | 82,28 | 0,00 | 7,78      | 0,00      | 259,44 | 25,67     | 49,77         | 45,29     | 36,24   | 49,92       | 47,31   | 0,318        | 0,221 | na                 |
| SD      | 6,92  |     | 3,91  | 0,00 | 0,81      | 0,00      | 11,46  | 4,85      | 4,84          | 3,19      | 1,72    | 0,66        | 1,18    | 0,098        | 0,053 | na                 |

**S1 Table. The original dataset used for calculations.** Groups are color coded according to “No. treat”: 6-11 AMD One year(blue), 19-22 AMD 20x (green), 0 – Control group (brown). Age is given in years at the date of examination. VA- visual acuity (ETDRS letters). CNV – choroidal neovascularization type. CRT – central retinal thickness. SPF – superficial retinal plexus. D – deep retinal plexus. FAZ – foveolar avascular zone
